# Supplementary material for: CBS extrapolation of Hartree–Fock energy: Pople and Dunning basis sets hand-to-hand on the endeavour
Source: Royal Society of Chemistry journal article supplement (doi:10.1039/c8cp07847e), 2019-01-01
Supplement: c8cp07847e1.pdf [file c8cp07847e1.pdf]

## **CBS extrapolation of Hartree-Fock energy: Pople and Dunning basis sets hand-to-hand on the endeavour**

### ***Supplementary Information***

A.J.C. Varandas,<sup>\*a,b</sup>

---

<sup>0a</sup> School of Physics and Physical Engineering, Qufu Normal University, 273165 Qufu, China.

<sup>0b</sup> Coimbra Chemistry Centre and Chemistry Department, University of Coimbra, 3004-535 Coimbra, Portugal; E-mail: varandas@uc.pt

**Table 1** Relative HF-GE/CBS(bs<sub>1</sub>,bs<sub>2</sub>) energies (in kJ mol<sup>-1</sup>) for the conformers of ACE-ALA- $\mathcal{G}$ -ALA-NME with respect to the  $\beta_a$  one.<sup>a)</sup>

| Method, (bs <sub>1</sub> ,bs <sub>2</sub> ) | $\mathcal{G}$ = GLY |            |        |            |         | SER            |            |        |            |         |
|---------------------------------------------|---------------------|------------|--------|------------|---------|----------------|------------|--------|------------|---------|
|                                             | $\beta_a^{b)}$      | $\alpha_R$ | PP-II  | $\alpha_L$ | $\beta$ | $\beta_a^{b)}$ | $\alpha_R$ | PP-II  | $\alpha_L$ | $\beta$ |
| MINI                                        | 0                   | 10.98      | 4.62   | 6.37       | 15.93   | 0              | 7.73       | 9.89   | -2.93      | 15.79   |
| MINI-s                                      | 0                   | 13.54      | 4.60   | 6.93       | 6.98    | 0              | 15.33      | 11.47  | -3.81      | 9.79    |
| MIDI                                        | 0                   | 8.57       | 29.92  | 3.59       | 19.10   | 0              | 14.58      | 37.47  | -2.88      | 15.49   |
| MIDI!                                       | 0                   | -12.63     | -4.03  | -14.82     | 16.27   | 0              | -5.33      | 3.97   | -16.70     | 12.56   |
| 3-21G                                       | 0                   | 4.90       | 27.68  | 0.69       | 20.16   | 0              | 8.47       | 35.77  | -5.67      | 18.24   |
| 3-21++G                                     | 0                   | 16.43      | 32.30  | 22.42      | 15.49   | 0              | 17.20      | 40.56  | 14.49      | 13.50   |
| STO-6G                                      | 0                   | -7.33      | -21.84 | -8.29      | 2.95    | 0              | -8.52      | -22.34 | -11.58     | 2.63    |
| 3-21GSP                                     | 0                   | 6.61       | 17.46  | 5.31       | 9.18    | 0              | 13.03      | 27.41  | 4.26       | 19.71   |
| 4-22GSP                                     | 0                   | 15.95      | 6.82   | 14.49      | 16.56   | 0              | 12.54      | 12.52  | 4.42       | 17.58   |
| 4-31G                                       | 0                   | 29.79      | 28.73  | 35.17      | 15.84   | 0              | 32.18      | 37.07  | 30.51      | 16.29   |
| (STO-2G,VDZ)                                | 0                   | 17.63      | 1.78   | 21.39      | 11.32   | 0              | 19.41      | 7.73   | 19.11      | 11.38   |
| (STO-2G,AVDZ)                               | 0                   | 28.78      | 3.39   | 37.44      | 11.38   | 0              | 29.24      | 10.56  | 35.53      | 10.93   |
| (STO-2G,VTZ)                                | 0                   | 30.17      | 5.45   | 38.63      | 11.62   | 0              | 31.01      | 12.15  | 37.57      | 11.41   |
| (STO-2G,AVTZ)                               | 0                   | 33.39      | 6.50   | 42.75      | 11.79   | 0              | 33.62      | 13.53  | 41.23      | 11.09   |
| (STO-2G,VQZ)                                | 0                   | 33.53      | 6.45   | 42.70      | 11.69   | 0              | 33.90      | 13.31  | 41.42      | 11.07   |
| (STO-2G,AVQZ)                               | 0                   | 34.52      | 6.83   | 43.86      | 11.75   | 0              | 34.77      | 13.86  | 42.40      | 11.06   |
| (STO-2G,V5Z)                                | 0                   | 34.64      | 6.80   | 43.96      | 11.72   | 0              | 34.90      | 13.84  | 42.54      | 11.04   |
| (VDZ,VTZ)                                   | 0                   | 25.96      | 4.17   | 32.84      | 11.51   | 0              | 27.12      | 10.62  | 31.38      | 11.40   |
| (AVDZ,AVTZ)                                 | 0                   | 31.70      | 5.26   | 40.83      | 11.62   | 0              | 32.02      | 12.36  | 39.18      | 11.02   |
| (VTZ,VQZ)                                   | 0                   | 31.94      | 5.96   | 40.78      | 11.66   | 0              | 32.54      | 12.74  | 39.62      | 11.24   |
| (AVTZ,AVQZ)                                 | 0                   | 34.01      | 6.67   | 43.38      | 11.76   | 0              | 34.25      | 13.70  | 41.90      | 11.08   |
| (VQZ,V5Z)                                   | 0                   | 34.11      | 6.63   | 43.37      | 11.70   | 0              | 34.42      | 13.57  | 42.01      | 11.06   |
| 3-param <sup>c)</sup>                       | 0                   | 34.63      | 6.76   | 43.93      | 11.70   | 0              | 34.90      | 13.79  | 42.52      | 11.04   |
| other <sup>d)</sup>                         | 0                   | 34.6       | 6.8    | 44.0       | 11.7    | 0              | 34.8       | 13.7   | 42.6       | 11.0    |

<sup>a)</sup>The convergence threshold criterion for all SCF steps was rather strict warranting a convergence up to  $10^{-8} E_h$  for all systems but  $\beta_a$  and  $\beta$  GLY-conformers where it is only  $10^{-7} E_h$  after 60 iterations. <sup>b)</sup>Assumed as reference. <sup>c)</sup>This work CBS extrapolation with three adjustable parameters, (STO-2G,VQZ,V5Z): see text. <sup>d)</sup>CBS extrapolation<sup>1</sup> from (VQZ,V5Z) using CBS scheme of Halkier *et al.*<sup>2,3</sup>

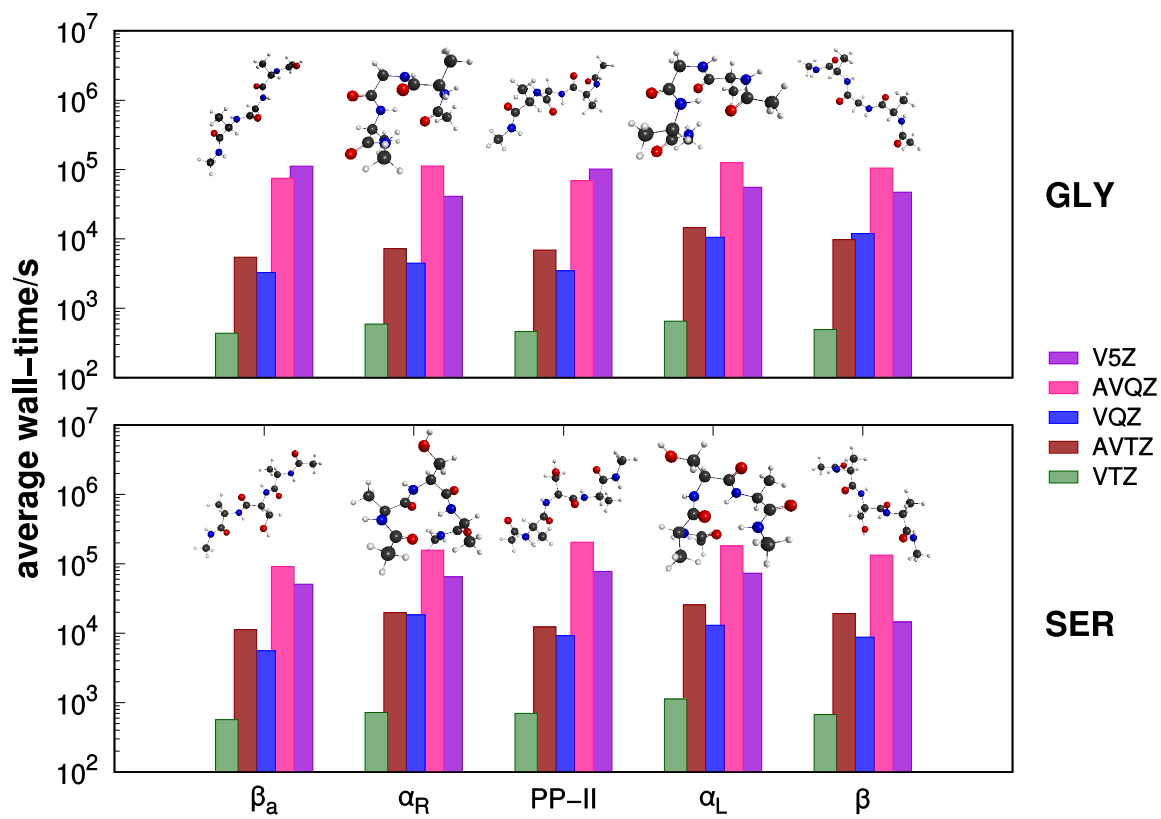

**Figure 1** Wall times (in logarithmic scale) for all conformers of TS-10 with TZ, QZ and 5Z basis sets.

## Acknowledgments

This work has the support of China's Shandong Province "Double-Hundred Talent Plan" (2018), and Foundation for Science and Technology, and Coimbra Chemistry Centre, Portugal, through the project UI0313/ QUI/2013, also co-funded by FEDER/COMPETE 2020-EU.

## Notes and references

- [1] L. Goerigk, A. Karton, J. M. L. Martin and L. Radom, *Mol. Phys.*, 2013, **15**, 7028–7031.
- [2] A. Halkier, T. Helgaker, P. Jørgensen, W. Klopper, H. Koch, J. Olsen and A. K. Wilson, *Chem. Phys. Lett.*, 1998, **286**, 243.
- [3] A. Halkier, T. Helgaker, P. Jørgensen, W. Klopper and J. Olsen, *Chem. Phys. Lett.*, 1999, **302**, 437–446.
